1 **African-specific improvement of a polygenic hazard score for age at diagnosis of**  
2 **prostate cancer**

3  
4 **Abstract**

5 Introduction: Polygenic hazard score (PHS) models are associated with age at diagnosis  
6 of prostate cancer. Our model developed in Europeans (PHS46), showed reduced  
7 performance in men with African genetic ancestry. We used a cross-validated search to  
8 identify SNPs that might improve performance in this population.

9 Material and Methods: Anonymized genotypic data were obtained from the PRACTICAL  
10 consortium for 6,253 men with African genetic ancestry. Ten iterations of a ten-fold  
11 cross-validation search were conducted, to select SNPs that would be included in the  
12 final PHS46+African model. The coefficients of PHS46+African were estimated in a Cox  
13 proportional hazards framework using age at diagnosis as the dependent variable and  
14 PHS46, and selected SNPs as predictors. The performance of PHS46 and  
15 PHS46+African were compared using the same cross-validated approach.

16 Results: Three SNPs (rs76229939, rs74421890, and rs5013678) were selected for  
17 inclusion in PHS46+African. All three SNPs are located on chromosome 8q24.  
18 PHS46+African showed substantial improvements in all performance metrics measured,  
19 including a 75% increase in the relative hazard of those in the upper 20% compared to  
20 the bottom 20% (2.47 to 4.34) and a 20% reduction in the relative hazard of those in the  
21 bottom 20% compared to the middle 40% (0.65 to 0.53).

22 Conclusions: We identified three SNPs that substantially improved the association of  
23 PHS46 with age at diagnosis of prostate cancer in men with African genetic ancestry to  
24 levels comparable to Europeans and Asians. A strategy of building on established  
25 statistical models might benefit ancestral groups generally under-represented in  
26 genome-wide association studies.

## 1 Introduction

2 Polygenic models can provide personalized estimates of the risk of developing  
3 prostate cancer. In the context of survival analysis, these models can provide insight into  
4 age at diagnosis of prostate cancer, and thus could be used to guide decisions on  
5 whether and when to offer screening<sup>1</sup>. Studies of polygenic models have often included  
6 only individuals of European genetic ancestry, owing to greater availability of data from  
7 that population<sup>2,3</sup>. As a consequence, these models have been tailored to identify and  
8 estimate coefficients of genetic common variants for that particular population, while  
9 potentially missing variants that may hold value in other populations<sup>2</sup>. There is concern  
10 that using these European-focused models could actually exacerbate health disparities<sup>2-</sup>  
11 <sup>4</sup>.

12 As an example, our group recently published on the performance of a polygenic  
13 hazard score (PHS) originally developed using a European dataset, in a multi-ethnic  
14 dataset consisting of individuals of European, African, and Asian genetic ancestry<sup>5</sup>. The  
15 model (called here PHS46), includes 46 single nucleotide polymorphisms (SNPs) in its  
16 calculation and was strongly associated with age at diagnosis in all three genetic  
17 populations ( $p < 10^{-16}$ ). However, the hazard ratio for prostate cancer between individuals  
18 in the upper 20<sup>th</sup> percentile to those in the lower 20<sup>th</sup> percentile of PHS46 was  
19 approximately half as large for those with African genetic ancestry (2.6) as it was for  
20 those with European (5.6) or Asian (4.6) ancestry. A similar pattern was observed for  
21 clinically significant prostate cancer and for death from prostate cancer.

22 In the current study, we attempt to bridge the apparent gap in model performance  
23 of PHS46 for individuals with African genetic ancestry. To this end, we used a machine  
24 learning approach to systematically search for SNPs that add statistical value to a base  
25 model of PHS46 among African men (PHS46+African). By including PHS46 as a

1 covariate in our SNP search, we sought to identify those SNPs that may hold particular  
2 value for individuals with African genetic ancestry.

3

#### 4 **Material and Methods**

##### 5 Study dataset

6 We obtained genotype and phenotype data from the Prostate Cancer Association  
7 Group to Investigate Cancer Associated Alterations in the Genome (PRACTICAL)<sup>6</sup>  
8 consortium for this study. Genotyping was performed using the OncoArray platform<sup>6</sup> and  
9 had undergone quality assurance steps, as described previously<sup>7</sup>. The genotypic  
10 ancestry of each individual was also determined previously<sup>6,8</sup>. In total, the African  
11 dataset consisted of data from 6,253 men with African genotypic ancestry. Missing SNP  
12 calls were replaced with the mean of the genotyped data for that SNP in the African  
13 dataset. Individuals without prostate cancer were censored at age at last follow-up in the  
14 Cox proportional hazards models. All contributing studies were approved by the relevant  
15 ethics committees; written informed consent was obtained from the study participants<sup>9</sup>.  
16 The present analyses used de-identified data from the PRACTICAL consortium. Please  
17 refer to Table S1 for a description of the PRACTICAL study groups that contributed data  
18 towards this analysis. PHS46 risk score for each individual in the African dataset was  
19 estimated as the sum of SNP allele counts ( $X$ ) multiplied by their respective coefficients  
20 ( $\beta$ )<sup>5</sup>:

$$21 \quad PHS46 = \sum_{i=1}^{46} X_i \beta_i$$

22

##### 23 SNP-scan

24 Training and testing sets were generated using 10 iterations of a 10-fold cross-  
25 validation structure resulting in 100 total permutations. For each permutation, a

1 multivariable logistic regression model using case/control status as the dependent  
2 variable was estimated using each genotyped SNP in turn, adjusting for PHS46 and four  
3 principal components based on genetic ancestry, determined previously<sup>8</sup>. SNPs with p-  
4 values less than  $1 \times 10^{-6}$  were considered for further analysis. In order of increasing p-  
5 value, each SNP was tested in a multiple Cox proportional hazards model, after  
6 adjusting for PHS46, four ancestral principal components, and previously selected  
7 SNPs. The Cox model in the SNP-scan used age at diagnosis of prostate cancer as the  
8 dependent variable. If the p-value of the coefficient of the tested SNP was less than  
9  $1 \times 10^{-6}$ , it was considered for the final model in that permutation. SNPs that reached this  
10 p-value threshold in more than 50% of the permutations were selected to construct the  
11 PHS46+African model, consisting of PHS46 and the newly identified SNPs.

12

### 13 Comparing performance between PHS46 and PHS46+African

14 For each permutation of the previously described cross-validation structure, an  
15 PHS46+African Cox proportional hazards model was estimated in the training set using  
16 PHS46 and the selected SNPs as independent predictors. The PHS46+African risk  
17 score for each individual is then estimated using the corresponding PHS46 score,  
18 selected SNP allele counts ( $Y$ ) and their respective coefficients ( $\alpha$ ):

$$19 \quad PHS46 + African = PHS46 + \sum_{j=1}^{SNPs} Y_j \alpha_j$$

20 The performance of the PHS46+African and PHS46 models was then determined in the  
21 cross-validation testing set, and the resulting hazard ratios (HR) were obtained, as  
22 previously described<sup>1</sup>. For each model, the PHS risk scores within the cross-validation  
23 testing set are assigned to quantile groups identified using the corresponding training set  
24 control values. The hazard ratio between two quantile groups, such as those in the top  
25 20% to those in the bottom 20%, is estimated as the exponential of the difference in

1 mean PHS values for each group. In this calculation, the PHS values are linearly scaled  
2 by a sample-weight correction factor, to account for case-control sampling<sup>1,5,10</sup>. Three  
3 HR were calculated: HR80/20 (top 20% to bottom 20%), HR98/50 (top 2% to middle  
4 40%) and HR20/50 (bottom 20% to middle 40%). The average HR across permutations  
5 for both PHS46+African and PHS46 are reported.

6 To allow for comparisons with previously published results, the performance  
7 metrics for PHS46 and PHS46+African were also estimated for age at diagnosis of  
8 clinically significant prostate cancer. When estimating performance for clinically  
9 significant prostate cancer, controls and non-clinically significant cancers were censored  
10 at age of last follow-up and age of diagnosis, respectively. The previously used criteria  
11 for clinically significant cancer were any of: Gleason score  $\geq 7$ , stage T3-T4, PSA  
12 concentration  $\geq 10$ ng/mL, nodal metastasis, or distant metastasis<sup>1</sup>. Paired t-tests were  
13 used to test for statistical significant differences ( $\alpha = 0.05$ ) in HR between  
14 PHS46+African and PHS46.

15 Additionally, in each permutation, the performance of a Cox model consisting of  
16 PHS46 and SNPs that were considered in that permutation was also estimated. These  
17 results are provided within the Table S2 and provide performance estimates that are not  
18 prone to information leakage from training to testing set.

19

## 20 Characterization of PHS+African

21 Coefficients of the PHS46+African model, consisting of PHS46 and the SNPs  
22 selected in the SNP-scan, were estimated using 1000 bootstrapped samples of the  
23 African dataset.

24

## 25 **Results**

### 26 Individual and OncoArray characteristics

1 In total, there were 3,013 men with (cases) and 3,240 men without (controls)  
2 prostate cancer in the African dataset. The mean [95% CI] ages of cases and controls  
3 were 62.4 [62.1, 62.7] and 61.8 [61.4, 62.1] years respectively. The OncoArray  
4 genotypic data, after the quality assurance process, included 444,323 SNPs.

5

#### 6 Single Nucleotide Polymorphism (SNP)-scan

7 Across the 100 permutations of the cross-validation iterations, a total of twelve  
8 SNPs were considered for final selection (Table S3). Three SNPs were selected in more  
9 than 50% of the permutations and included in the final PHS46+African model. By cross-  
10 referencing the chromosomal positions against dbSNP<sup>11</sup>, these variants were identified  
11 as rs76229939, rs74421890, and rs5013678. All 3 SNPs (Table 1) are located on  
12 chromosome 8q24, a region of the chromosome previously identified as containing  
13 common variants associated with prostate cancer<sup>12,13</sup>. An examination of the Pearson  
14 correlation coefficients (Table S4) showed little correlation, ranging from -0.05 to -0.07,  
15 among genotype data from the 3 SNPs in the African dataset.

16 Reference threshold (Table S5) and mean (Table S6) values for PHS46+African  
17 in the African dataset are presented in the Supplemental Data.

18

#### 19 Performance of PHS46+African

20 Figure 1 demonstrates the difference in HRs between PHS46+African and  
21 PHS46 within the African dataset using age at diagnosis of any prostate cancer. Overall,  
22 we observed an improvement in all the metrics calculated: a 75% increase in HR98/50  
23 from 2.10 to 3.67; a 79% increase in HR80/20 from 2.47 to 4.42; and a 23% decrease in  
24 HR20/50 from 0.65 to 0.51. We also observed improvements in all performance metrics  
25 when using age at diagnosis of clinically significant prostate cancer: 103% increase in  
26 HR98/50 from 1.91 to 3.88, 113% improvement in HR80/20 from 2.21 to 4.71, and 29%

1 improvement in HR20/50 from 0.70 to 0.50. All observed changes in HR were  
2 statistically significant ( $p < 1 \times 10^{-16}$ ).

3

#### 4 **Discussion**

5 Using a cross-validated search of a dataset made up entirely of men with African  
6 genetic ancestry, we were able to identify three SNPs that substantially improved the  
7 performance of PHS46 in this population to levels that are comparable to those  
8 observed in Europeans and Asians. The three SNPs, rs76229939, rs74421890, and  
9 rs5013678, are all located on chromosome 8q24 – a region of the genome where  
10 variants have been associated with prostate cancer in both the general population and  
11 specifically in men with African genetic ancestry<sup>13,14</sup>. Despite the relative proximity of the  
12 three SNPs on chromosome 8, their genetic data was not strongly correlated in our  
13 dataset, suggesting that each SNP provides non-redundant information for an  
14 individual's genetic score.

15 Each of the three SNPs have been previously identified in the literature to be  
16 associated with prostate cancer: rs76229939 is an intron variant of the prostate-cancer-  
17 associated transcript 2 (PCAT2) gene, while rs74421890 and rs5013678 are both non-  
18 coding transcript variants of the prostate-cancer-associated non-coding RNA 1  
19 (PRNCR1) gene. The minor allele frequencies of rs76229939 and rs74421890 in  
20 Europeans, as reported by dbSNP<sup>11</sup>, are approximately zero to three decimal places,  
21 which may explain why they were not selected in the original formulation of PHS46.

22 This study is not meant to be an exhaustive search for all possible SNPs that are  
23 associated with the age of diagnosis of prostate cancer in individuals with African  
24 genetic ancestry. Our study is also limited by the small number of available observations  
25 relative to those often found in many genome-wide association studies, which can have  
26 tens or hundreds of thousands of individuals. However, we were able to extract

1 information that is likely robust by employing a cross-validated search for those SNPs  
2 that specifically add value to the performance of PHS46, and not simply independently  
3 associated with prostate cancer. We also note that no SNP score, including PHS46 and  
4 PHS46+African, has been shown to discriminate men at risk of aggressive prostate  
5 cancer from those at risk of indolent prostate cancer. Finally, the performance metrics  
6 reported in this study may be biased by the leakage of information across cross-  
7 validated folds of the data when identifying those SNPs to include in the final African-  
8 PHS model. This bias is expected to be similar for all SNPs and should not have  
9 influenced selection of the three SNPs included in the final model over those not  
10 selected.

11 In conclusion, we identified three SNPs (rs76229939, rs74421890, and  
12 rs5013678) that substantially improved the performance of PHS46 in a dataset of men  
13 with African genetic ancestry. We believe that this strategy of building on established  
14 models developed on large dataset could be applied to other groups that are generally  
15 under-represented in genome-wide association studies. This strategy may further help to  
16 bridge performance gaps in personalized genetic risk scores across populations.

17



## 1 **References**

- 2 1. Seibert, T.M., Fan, C.C., Wang, Y., Zuber, V., Karunamuni, R., Parsons, J.K., Eeles,  
3 R.A., Easton, D.F., Kote-Jarai, Z., Al Olama, A.A., et al. (2018). Polygenic hazard score  
4 to guide screening for aggressive prostate cancer: Development and validation in large  
5 scale cohorts. *BMJ* 360, 1–7.
- 6 2. Duncan, L., Shen, H., Gelaye, B., Meijssen, J., Ressler, K., Feldman, M., Peterson, R.,  
7 and Domingue, B. (2019). Analysis of polygenic risk score usage and performance in  
8 diverse human populations. *Nat. Commun.* 10,.
- 9 3. Popejoy, A., and Fullerton, S. (2016). Genomics is falling on diversity. *Nature* 538,.
- 10 4. Martin, A.R., Kanai, M., Kamatani, Y., Okada, Y., Neale, B.M., and Daly, M.J. (2019).  
11 Clinical use of current polygenic risk scores may exacerbate health disparities. *Nat.*  
12 *Genet.* 51, 584–591.
- 13 5. Minh-Phuong, H.-L., Chieh Fan, C., Karunamuni, R., Martinez, M.E., Eeles, R.A.,  
14 Kote-Jarai, Z., Muir, K., Collaborators, U., Schleutker, J., Pashayan, N., et al. (2019).  
15 Polygenic hazard score predicts aggressive and fatal prostate cancer in multi-ethnic  
16 populations. *MedRxiv*.
- 17 6. Amos, C.I., Dennis, J., Wang, Z., Byun, J., Schumacher, F.R., Gayther, S.A., Casey,  
18 G., Hunter, D.J., Sellers, T.A., Gruber, S.B., et al. (2017). The oncoarray consortium: A  
19 network for understanding the genetic architecture of common cancers. *Cancer*  
20 *Epidemiol. Biomarkers Prev.* 26, 126–135.
- 21 7. Leitzmann, M.F., and Rohrmann, S. (2012). Risk factors for the onset of prostatic  
22 cancer: Age, location, and behavioral correlates. *Clin. Epidemiol.* 4, 1–11.
- 23 8. Li, Y., Byun, J., Cai, G., Xiao, X., Han, Y., Cornelis, O., Dinulos, J.E., Dennis, J.,  
24 Easton, D., Gorlov, I., et al. (2016). FastPop: A rapid principal component derived  
25 method to infer intercontinental ancestry using genetic data. *BMC Bioinformatics* 17, 1–  
26 8.

- 1 9. Kote-Jarai, Z., Easton, D.F., Stanford, J.L., Ostrander, E.A., Schleutker, J., Ingles,  
2 S.A., Schaid, D., Thibodeau, S., Dörk, T., Neal, D., et al. (2008). Multiple novel prostate  
3 cancer predisposition loci confirmed by an international study: The PRACTICAL  
4 consortium. *Cancer Epidemiol. Biomarkers Prev.* 17, 2052–2061.
- 5 10. Therneau, T.M., and Li, H. (1999). Computing the Cox Model for Case Cohort  
6 Designs. *Lifetime Data Anal.* 5, 99–112.
- 7 11. Sherry, S.T., Ward, M., and Sirotkin, K. (1999). dbSNP - database for single  
8 nucleotide polymorphisms and other classes of minor genetic variation. *Genome Res.* 9,  
9 677–679.
- 10 12. Yeager, M., Orr, N., Hayes, R.B., Jacobs, K.B., Kraft, P., Wacholder, S., Minichiello,  
11 M.J., Fearnhead, P., Yu, K., Chatterjee, N., et al. (2007). Genome-wide association  
12 study of prostate cancer identifies a second risk locus at 8q24. *Nat. Genet.* 39, 645–649.
- 13 13. Haiman, C.A., Patterson, N., Freedman, M.L., Myers, S.R., Pike, M.C., Waliszewska,  
14 A., Neubauer, J., Tandon, A., Schirmer, C., McDonald, G.J., et al. (2007). Multiple  
15 regions within 8q24 independently affect risk for prostate cancer. *Nat. Genet.* 39, 638–  
16 644.
- 17 14. Han, Y., Rand, K.A., Hazelett, D.J., Ingles, S.A., Kittles, R.A., Strom, S.S., Rybicki,  
18 B.A., Nemesure, B., Isaacs, W.B., Stanford, J.L., et al. (2016). Prostate cancer  
19 susceptibility in men of African ancestry at 8q24. *J. Natl. Cancer Inst.* 108, 1–5.
- 20  
21

1 **Figure Legends**

2 **Figure 1. Comparison between PHS46 and PHS46+African.** Mean hazard ratio

3 metrics plotted for PHS46 and PHS46+African models in the African dataset.

4 Improvements were observed in all performance metrics investigated. Error bars

5 represent 95% confidence interval.

6

1 **Table 1. Characteristics of PHS46+African SNPs.** RS-ID, chromosome and base-pair  
2 position (based on version 37), effect and reference alleles, bootstrap-estimated beta,  
3 and effect allele frequencies in Africans from 1000Genomes (referenced from dbSNP) of  
4 the three SNPs selected for addition to PHS46.

| <b>RS number</b> | <b>Chromosome</b> | <b>Position</b> | <b>Effect</b> | <b>Ref</b> | <b>beta</b> | <b>Frequency (%)</b> |
|------------------|-------------------|-----------------|---------------|------------|-------------|----------------------|
| rs76229939       | 8                 | 128085394       | G             | A          | 0.441       | 4.8                  |
| rs74421890       | 8                 | 128096183       | A             | G          | 0.415       | 4.1                  |
| rs5013678        | 8                 | 128103979       | G             | A          | -0.260      | 8.1                  |

5

6

- 1 **Supplemental Data Description**
- 2 The Supplemental Data contains (1) six tables
- 3

## 1 **Appendix A1. Data Availability Statement**

2 The data used in this work were obtained from the Prostate Cancer Association Group to  
3 Investigate Cancer Associated Alterations in the Genome (PRACTICAL) consortium,  
4 Readers who are interested in accessing the data must first submit a proposal to the  
5 Data Access Committee. If the reader is not a member of the consortium, their concept  
6 form must be sponsored by a principal investigator (PI) of one of the PRACTICAL  
7 consortium member studies. If approved by the Data Access Committee, PIs within the  
8 consortium, each of whom retains ownership of their data submitted to the consortium,  
9 can then choose to participate in the specific proposal. In addition, portions of the data  
10 are available for request from dbGaP (database of Genotypes and Phenotypes) which is  
11 maintained by the National Center for Biotechnology Information (NCBI):

12 <https://www.ncbi.nlm.nih.gov/gap/?term=lcogs+prostate>[https://www.ncbi.nlm.nih.gov/gap](https://www.ncbi.nlm.nih.gov/gap/?term=lcogs+prostate)  
13 [/?term=lcogs+prostate](https://www.ncbi.nlm.nih.gov/gap/?term=lcogs+prostate).

14 Anyone can apply to join the consortium. The eligibility requirements are listed here:  
15 [http://practical.icr.ac.uk/blog/?page\\_id=9](http://practical.icr.ac.uk/blog/?page_id=9). Joining the consortium would not guarantee  
16 access, as a proposal for access would still be submitted to the Data Access Committee,  
17 but there would be no need for a separate member sponsor. Readers may find  
18 information about application by using the contact information below:

19

20 Rosalind Eeles

21 Principal Investigator for PRACTICAL

22 Professor of Oncogenetics

23 Institute of Cancer Research (ICR)

24 Sutton, UK

25 Email: [PRACTICAL@icr.ac.uk](mailto:PRACTICAL@icr.ac.uk)

26 URL: <http://practical.icr.ac.uk>

27 Tel: ++44 (0)20 8722 4094

28

1 **Appendix A2. Funding sources for the PRACTICAL consortium**

2

3 CRUK and PRACTICAL consortium

4 This work was supported by the Canadian Institutes of Health Research, European  
5 Commission's Seventh Framework Programme grant agreement n° 223175 (HEALTH-  
6 F2-2009-223175), Cancer Research UK Grants C5047/A7357, C1287/A10118,  
7 C1287/A16563, C5047/A3354, C5047/A10692, C16913/A6135, and The National  
8 Institute of Health (NIH) Cancer Post-Cancer GWAS initiative grant: No. 1 U19 CA  
9 148537-01 (the GAME-ON initiative).

10 We would also like to thank the following for funding support: The Institute of Cancer  
11 Research and The Everyman Campaign, The Prostate Cancer Research Foundation,  
12 Prostate Research Campaign UK (now Prostate Action), The Orchid Cancer Appeal,  
13 The National Cancer Research Network UK, The National Cancer Research Institute  
14 (NCRI) UK. We are grateful for support of NIHR funding to the NIHR Biomedical  
15 Research Centre at The Institute of Cancer Research and The Royal Marsden NHS  
16 Foundation Trust.

17 The Prostate Cancer Program of Cancer Council Victoria also acknowledge grant  
18 support from The National Health and Medical Research Council, Australia (126402,  
19 209057, 251533, , 396414, 450104, 504700, 504702, 504715, 623204, 940394,  
20 614296,), VicHealth, Cancer Council Victoria, The Prostate Cancer Foundation of  
21 Australia, The Whitten Foundation, PricewaterhouseCoopers, and Tattersall's. EAO,  
22 DMK, and EMK acknowledge the Intramural Program of the National Human Genome  
23 Research Institute for their support.

24 Genotyping of the OncoArray was funded by the US National Institutes of Health (NIH)  
25 [U19 CA 148537 for ELucidating Loci Involved in Prostate cancer SuscEptibility  
26 (ELLIPSE) project and X01HG007492 to the Center for Inherited Disease Research  
27 (CIDR) under contract number HHSN268201200008].

28 This study would not have been possible without the contributions of the following:  
29 Coordination team, bioinformatician and genotyping centers: Genotyping at CCGE,  
30 Cambridge: Caroline Baines and Don Conroy

31

1 Funding for the iCOGS infrastructure came from: the European Community's Seventh  
2 Framework Programme under grant agreement n° 223175 (HEALTH-F2-2009-223175)  
3 (COGS), Cancer Research UK (C1287/A10118, C1287/A 10710, C12292/A11174,  
4 C1281/A12014, C5047/A8384, C5047/A15007, C5047/A10692, C8197/A16565), the  
5 National Institutes of Health (CA128978) and Post-Cancer GWAS initiative (1U19  
6 CA148537, 1U19 CA148065 and 1U19 CA148112 - the GAME-ON initiative), the  
7 Department of Defence (W81XWH-10-1-0341), the Canadian Institutes of Health  
8 Research (CIHR) for the CIHR Team in Familial Risks of Breast Cancer, Komen  
9 Foundation for the Cure, the Breast Cancer Research Foundation, and the Ovarian  
10 Cancer Research Fund.

11

12 This study would not have been possible without the contributions of the following: Per  
13 Hall (COGS); Douglas F. Easton, Paul Pharoah, Kyriaki Michailidou, Manjeet K. Bolla,  
14 Qin Wang (BCAC), Andrew Berchuck (OCAC), Rosalind A. Eeles, Douglas F. Easton,  
15 Ali Amin Al Olama, Zsofia Kote-Jarai, Sara Benlloch (PRACTICAL), Georgia Chenevix-  
16 Trench, Antonis Antoniou, Lesley McGuffog, Fergus Couch and Ken Offit (CIMBA), Joe  
17 Dennis, Alison M. Dunning, Andrew Lee, and Ed Dicks, Craig Luccarini and the staff of  
18 the Centre for Genetic Epidemiology Laboratory, Javier Benitez, Anna Gonzalez-Neira  
19 and the staff of the CNIO genotyping unit, Jacques Simard and Daniel C. Tessier,  
20 Francois Bacot, Daniel Vincent, Sylvie LaBoissière and Frederic Robidoux and the staff  
21 of the McGill University and Génome Québec Innovation Centre, Stig E. Bojesen, Sune  
22 F. Nielsen, Borge G. Nordestgaard, and the staff of the Copenhagen DNA laboratory,  
23 and Julie M. Cunningham, Sharon A. Windebank, Christopher A. Hilker, Jeffrey Meyer  
24 and the staff of Mayo Clinic Genotyping Core Facility

25

26 Additional funding and acknowledgments from studies in PRACTICAL:

27

28 Information of the PRACTICAL consortium can be found at <http://practical.icr.ac.uk/>

29

### 30 BioVU

31 The dataset(s) used for the analyses described were obtained from Vanderbilt University  
32 Medical Center's BioVU, which is supported by institutional funding and by the National  
33 Center for Research Resources, Grant UL1 RR024975-01 (which is now at the National  
34 Center for Advancing Translational Sciences, Grant 2 UL1 TR000445-06).



1

2 CPDR

3 Uniformed Services University for the Health Sciences HU0001-10-2-0002 (PI: David G.  
4 McLeod, MD)

5

6 EPICAP

7 The EPICAP study was supported by grants from Ligue Nationale Contre le Cancer;  
8 Institut National du Cancer (INCa); Fondation ARC; Fondation de France; Agence  
9 Nationale de sécurité sanitaire de l'alimentation, de l'environnement et du travail  
10 (ANSES); Ligue départementale du Val de Marne. The EPICAP study group would like  
11 to thank all urologists, Antoinette Anger and Hasina Randrianasolo (study monitors),  
12 Anne-Laure Astolfi, Coline Bernard, Oriane Noyer, Marie-Hélène De Campo, Sandrine  
13 Margaroline, Louise N'Diaye, Sabine Perrier-Bonnet (Clinical Research nurses)

14

15 KARUPROSTATE

16 The Karuprostate study was supported by the the Frech National Health Directorate, the  
17 Association pour la Recherche sur le Cancer, la Ligue Nationale contre le Cancer, the  
18 French Agency for Environmental and Occupational Health Safety (ANSES) and by the  
19 Association pour la Recherche sur les Tumeurs de la Prostate. We would like to thank  
20 Séverine Ferdinand for valuable contributions to the study.

21

22 MOFFITT

23 The Moffitt group was supported by the US National Cancer Institute (R01CA128813, PI:  
24 J.Y. Park).

25

26 NMHS

27 Funding for the Nashville Men's Health Study (NMHS) was provided by the National  
28 Institutes of Health Grant numbers: RO1CA121060

29

30 PCaP

31 The North Carolina - Louisiana Prostate Cancer Project (PCaP) and the Health Care  
32 Access and Prostate Cancer Treatment in North Carolina (HCaP-NC) study are carried  
33 out as collaborative studies supported by the Department of Defense contract DAMD 17-

1 03-2-0052 and the American Cancer Society award RSGT-08-008-01-CPHPS,  
2 respectively.

3 The authors thank the staff, advisory committees and research subjects participating in  
4 the PCaP and HCaP-NC studies for their important contributions.

5

#### 6 PROtEuS

7 PROtEuS was supported financially through grants from the Canadian Cancer Society  
8 [13149, 19500, 19864, 19865] and the Cancer Research Society, in partnership with the  
9 Ministère de l'enseignement supérieur, de la recherche, de la science et de la  
10 technologie du Québec, and the Fonds de la recherche du Québec - Santé. PROtEuS  
11 would like to thank its collaborators and research personnel, and the urologists involved  
12 in subjects recruitment. We also wish to acknowledge the special contribution made by  
13 Ann Hsing and Anand Chokkalingam to the conception of the genetic component of  
14 PROtEuS.

15

#### 16 SABOR

17 The SABOR research is supported by NIH/NCI Early Detection Research Network, grant  
18 U01 CA0866402-18. Also supported by the Cancer Center Support Grant to the Mays  
19 Cancer Center from the National Cancer Institute (US) P30 CA054174

20

#### 21 SCCS

22 SCCS is funded by NIH grant R01 CA092447, and SCCS sample preparation was  
23 conducted at the Epidemiology Biospecimen Core Lab that is supported in part by the  
24 Vanderbilt-Ingram Cancer Center (P30 CA68485). Data on SCCS cancer cases used in  
25 this publication were provided by the Alabama Statewide Cancer Registry; Kentucky  
26 Cancer Registry, Lexington, KY; Tennessee Department of Health, Office of Cancer  
27 Surveillance; Florida Cancer Data System; North Carolina Central Cancer Registry,  
28 North Carolina Division of Public Health; Georgia Comprehensive Cancer Registry;  
29 Louisiana Tumor Registry; Mississippi Cancer Registry; South Carolina Central Cancer  
30 Registry; Virginia Department of Health, Virginia Cancer Registry; Arkansas Department  
31 of Health, Cancer Registry, 4815 W. Markham, Little Rock, AR 72205. The Arkansas  
32 Central Cancer Registry is fully funded by a grant from National Program of Cancer  
33 Registries, Centers for Disease Control and Prevention (CDC). Data on SCCS cancer  
34 cases from Mississippi were collected by the Mississippi Cancer Registry which

1 participates in the National Program of Cancer Registries (NPCR) of the Centers for  
2 Disease Control and Prevention (CDC). The contents of this publication are solely the  
3 responsibility of the authors and do not necessarily represent the official views of the  
4 CDC or the Mississippi Cancer Registry.

5

#### 6 SCPCS

7 SCPCS is funded by CDC grant S1135-19/19, and SCPCS sample preparation was  
8 conducted at the Epidemiology Biospecimen Core Lab that is supported in part by the  
9 Vanderbilt-Ingram Cancer Center (P30 CA68485).

10

#### 11 SFPCS

12 SFPCS was funded by California Cancer Research Fund grant 99-00527V-10182

#### 13 SWOG-PCPT / SWOG-SELECT

14 PCPT and SELECT are funded by Public Health Service grants U10CA37429 and  
15 5UM1CA182883 from the National Cancer Institute. The authors thank the site  
16 investigators and staff and, most importantly, the participants from PCPT who donated  
17 their time to this trial.

18

#### 19 UKGPCS

20 UKGPCS would also like to thank the following for funding support: The Institute of  
21 Cancer Research and The Everyman Campaign, The Prostate Cancer Research  
22 Foundation, Prostate Research Campaign UK (now Prostate Action), The Orchid Cancer  
23 Appeal, The National Cancer Research Network UK, The National Cancer Research  
24 Institute (NCRI) UK. We are grateful for support of NIHR funding to the NIHR Biomedical  
25 Research Centre at The Institute of Cancer Research and The Royal Marsden NHS  
26 Foundation Trust. UKGPCS should also like to acknowledge the NCRN nurses, data  
27 managers and Consultants for their work in the UKGPCS study. UKGPCS would like to  
28 thank all urologists and other persons involved in the planning, coordination, and data  
29 collection of the study. KM and AL were in part supported from the NIHR Manchester  
30 Biomedical Research Centre

31

#### 32 WUGS

33 WUGS would like to thank the following for funding support: The Anthony DeNovi Fund,  
34 the Donald C. McGraw Foundation, and the St. Louis Men's Group Against Cancer.

## 1 **Appendix A3 – Members of the PRACTICAL Consortium**

2 Christopher A. Haiman<sup>1</sup>, Fredrick R. Schumacher<sup>2,3</sup>, Sara Benlloch<sup>4,5</sup>, Ali Amin Al  
3 Olama<sup>6,7</sup>, Sonja I. Berndt<sup>8</sup>, David V. Conti<sup>1</sup>, Fredrik Wiklund<sup>9</sup>, Stephen Chanock<sup>8</sup>, Susan  
4 M. Gapstur<sup>10</sup>, Victoria L. Stevens<sup>10</sup>, Jyotsna Batra<sup>11,12</sup>, Judith Clements<sup>11,12</sup>, APCB  
5 BioResource<sup>13,14</sup>, Henrik Grönberg<sup>15</sup>, Nora Pashayan<sup>16,17</sup>, Johanna Schleutker<sup>18,19</sup>,  
6 Demetrius Albanes<sup>8</sup>, Stephanie Weinstein<sup>8</sup>, Alicja Wolk<sup>20,21</sup>, Catharine West<sup>22</sup>, Lorelei  
7 Mucci<sup>23</sup>, Stella Koutros<sup>8</sup>, Karina Dalsgaard Sørensen<sup>24,25</sup>, Eli Marie Grindedal<sup>26</sup>, David E.  
8 Neal<sup>27,28,29</sup>, Freddie C. Hamdy<sup>30,31</sup>, Jenny L. Donovan<sup>32</sup>, Ruth C. Travis<sup>33</sup>, Robert J.  
9 Hamilton<sup>34,35</sup>, Sue Ann Ingles<sup>36</sup>, Barry S. Rosenstein<sup>37,38</sup>, Yong-Jie Lu<sup>39</sup>, Graham G.  
10 Giles<sup>40,41,42</sup>, Ana Vega<sup>43,44,45</sup>, Manolis Kogevinas<sup>46,47,48,49</sup>, Kathryn L. Penney<sup>50</sup>, Janet L.  
11 Stanford<sup>51,52</sup>, Cezary Cybulski<sup>53</sup>, Børge G. Nordestgaard<sup>54,55</sup>, Hermann Brenner<sup>56,57,58</sup>,  
12 Christiane Maier<sup>59</sup>, Jeri Kim<sup>60</sup>, Manuel R. Teixeira<sup>61,62</sup>, Susan L. Neuhausen<sup>63</sup>, Kim De  
13 Ruyck<sup>64</sup>, Azad Razack<sup>65</sup>, Lisa F. Newcomb<sup>51,66</sup>, Davor Leskelä<sup>67</sup>, Radka Kaneva<sup>68</sup>,  
14 Nawaid Usmani<sup>69,70</sup>, Frank Claessens<sup>71</sup>, Paul A. Townsend<sup>72</sup>, Manuela Gago-  
15 Dominguez<sup>73,74</sup>, Monique J. Roobol<sup>75</sup>, Kay-Tee Khaw<sup>76</sup>, Lisa Cannon-Albright<sup>77,78</sup>,  
16 Hardev Pandha<sup>79</sup>, Stephen N. Thibodeau<sup>80</sup>, Peter Kraft<sup>81</sup>, Elio Riboli<sup>82</sup>

17

18 <sup>1</sup>Center for Genetic Epidemiology, Department of Preventive Medicine, Keck School of  
19 Medicine, University of Southern California/Norris Comprehensive Cancer Center, Los  
20 Angeles, CA 90015, USA

21 <sup>2</sup>Department of Population and Quantitative Health Sciences, Case Western Reserve  
22 University, Cleveland, OH 44106-7219, USA

23 <sup>3</sup>Seidman Cancer Center, University Hospitals, Cleveland, OH 44106, USA.

24 <sup>4</sup>Centre for Cancer Genetic Epidemiology, Department of Public Health and Primary  
25 Care, University of Cambridge, Strangeways Research Laboratory, Cambridge CB1  
26 8RN, UK

27 <sup>5</sup>The Institute of Cancer Research, London, SM2 5NG, UK

28 <sup>6</sup>Centre for Cancer Genetic Epidemiology, Department of Public Health and Primary  
29 Care, University of Cambridge, Strangeways Research Laboratory, Cambridge, UK

30 <sup>7</sup>University of Cambridge, Department of Clinical Neurosciences, Stroke Research  
31 Group, R3, Box 83, Cambridge Biomedical Campus, Cambridge CB2 0QQ, UK

32 <sup>8</sup>Division of Cancer Epidemiology and Genetics, National Cancer Institute, NIH,  
33 Bethesda, Maryland, 20892, USA

34 <sup>9</sup>Department of Medical Epidemiology and Biostatistics, Karolinska Institute, SE-171

- 1 77 Stockholm, Sweden
- 2 <sup>10</sup>Behavioral and Epidemiology Research Group, Research Program, American Cancer  
3 Society, 250 Williams Street, Atlanta, GA 30303, USA
- 4 <sup>11</sup>Australian Prostate Cancer Research Centre-Qld, Institute of Health and Biomedical  
5 Innovation and School of Biomedical Sciences, Queensland University of Technology,  
6 Brisbane QLD 4059, Australia
- 7 <sup>12</sup>Translational Research Institute, Brisbane, Queensland 4102, Australia
- 8 <sup>13</sup>Australian Prostate Cancer Research Centre-Qld, Queensland University of  
9 Technology, Brisbane; Prostate Cancer Research Program, Monash University,  
10 Melbourne; Dame Roma Mitchell Cancer Centre, University of Adelaide, Adelaide; Chris  
11 O'Brien Lifehouse and
- 12 <sup>14</sup>Translational Research Institute, Brisbane, Queensland, Australia
- 13 <sup>15</sup>Department of Medical Epidemiology and Biostatistics, Karolinska Institute, Stockholm,  
14 Sweden
- 15 <sup>16</sup>Department of Applied Health Research, University College London, London, WC1E  
16 7HB, UK
- 17 <sup>17</sup>Centre for Cancer Genetic Epidemiology, Department of Oncology, University of  
18 Cambridge, Strangeways Laboratory, Worts Causeway, Cambridge, CB1 8RN, UK
- 19 <sup>18</sup>Institute of Biomedicine, Kiinamylynkatu 10, FI-20014 University of Turku, Finland
- 20 <sup>19</sup>Department of Medical Genetics, Genomics, Laboratory Division, Turku University  
21 Hospital, PO Box 52, 20521 Turku, Finland
- 22 <sup>20</sup>Division of Nutritional Epidemiology, Institute of Environmental Medicine, Karolinska  
23 Institutet, SE-171 77 Stockholm, Sweden
- 24 <sup>21</sup>Department of Surgical Sciences, Uppsala University, 75185 Uppsala, Sweden
- 25 <sup>22</sup>Division of Cancer Sciences, University of Manchester, Manchester Academic Health  
26 Science Centre, Radiotherapy Related Research, The Christie Hospital NHS Foundation  
27 Trust, Manchester, M13 9PL UK
- 28 <sup>23</sup>Department of Epidemiology, Harvard T. H. Chan School of Public Health, Boston, MA  
29 02115, USA
- 30 <sup>24</sup>Department of Molecular Medicine, Aarhus University Hospital, Palle Juul-Jensen  
31 Boulevard 99, 8200 Aarhus N, Denmark
- 32 <sup>25</sup>Department of Clinical Medicine, Aarhus University, DK-8200 Aarhus N
- 33 <sup>26</sup>Department of Medical Genetics, Oslo University Hospital, 0424 Oslo, Norway
- 34 <sup>27</sup>Nuffield Department of Surgical Sciences, University of Oxford, Room 6603, Level 6,

- 1 John Radcliffe Hospital, Headley Way, Headington, Oxford, OX3 9DU, UK
- 2 <sup>28</sup>University of Cambridge, Department of Oncology, Box 279, Addenbrooke's Hospital,  
3 Hills Road, Cambridge CB2 0QQ, UK
- 4 <sup>29</sup>Cancer Research UK, Cambridge Research Institute, Li Ka Shing Centre, Cambridge  
5 UK
- 6 <sup>30</sup>Nuffield Department of Surgical Sciences, University of Oxford, Oxford, OX1 2JD, UK
- 7 <sup>31</sup>Faculty of Medical Science, University of Oxford, John Radcliffe Hospital, Oxford, UK
- 8 <sup>32</sup>Population Health Sciences, Bristol Medical School, University of Bristol, BS8 2PS, UK
- 9 <sup>33</sup>Cancer Epidemiology Unit, Nuffield Department of Population Health, University of  
10 Oxford, Oxford, OX3 7LF, UK
- 11 <sup>34</sup>Dept. of Surgical Oncology, Princess Margaret Cancer Centre, Toronto ON M5G 2M9,  
12 Canada
- 13 <sup>35</sup>Dept. of Surgery (Urology), University of Toronto, Canada
- 14 <sup>36</sup>Department of Preventive Medicine, Keck School of Medicine, University of Southern  
15 California/Norris Comprehensive Cancer Center, Los Angeles, CA 90015, USA
- 16 <sup>37</sup>Department of Radiation Oncology and Department of Genetics and Genomic  
17 Sciences, Box 1236, Icahn School of Medicine at Mount Sinai, One Gustave L. Levy  
18 Place, New York, NY 10029, USA
- 19 <sup>38</sup>Department of Genetics and Genomic Sciences, Icahn School of Medicine at Mount  
20 Sinai, New York, NY 10029-5674 , USA.
- 21 <sup>39</sup>Centre for Molecular Oncology, Barts Cancer Institute, Queen Mary University of  
22 London, John Vane Science Centre, Charterhouse Square, London, EC1M 6BQ, UK
- 23 <sup>40</sup>Cancer Epidemiology Division, Cancer Council Victoria, 615 St Kilda Road, Melbourne,  
24 VIC 3004, Australia
- 25 <sup>41</sup>Centre for Epidemiology and Biostatistics, Melbourne School of Population and Global  
26 Health, The University of Melbourne, Grattan Street, Parkville, VIC 3010, Australia
- 27 <sup>42</sup>Precision Medicine, School of Clinical Sciences at Monash Health, Monash University,  
28 Clayton, Victoria 3168, Australia
- 29 <sup>43</sup>Fundación Pública Galega Medicina Xenómica, Santiago De Compostela, 15706,  
30 Spain.
- 31 <sup>44</sup>Instituto de Investigación Sanitaria de Santiago de Compostela, Santiago De  
32 Compostela, 15706, Spain.
- 33 <sup>45</sup>Centro de Investigación en Red de Enfermedades Raras (CIBERER), Spain
- 34 <sup>46</sup>ISGlobal, Barcelona, Spain

- 1 <sup>47</sup>IMIM (Hospital del Mar Medical Research Institute), Barcelona, Spain
- 2 <sup>48</sup>Universitat Pompeu Fabra (UPF), Barcelona, Spain
- 3 <sup>49</sup>CIBER Epidemiología y Salud Pública (CIBERESP), Madrid, Spain
- 4 <sup>50</sup>Channing Division of Network Medicine, Department of Medicine, Brigham and  
5 Women's Hospital/Harvard Medical School, Boston, MA 02184, USA
- 6 <sup>51</sup>Division of Public Health Sciences, Fred Hutchinson Cancer Research Center, Seattle,  
7 Washington, 98109-1024, USA
- 8 <sup>52</sup>Department of Epidemiology, School of Public Health, University of Washington,  
9 Seattle, Washington 98195, USA
- 10 <sup>53</sup>International Hereditary Cancer Center, Department of Genetics and Pathology,  
11 Pomeranian Medical University, Szczecin, Poland
- 12 <sup>54</sup>Faculty of Health and Medical Sciences, University of Copenhagen, 2200  
13 Copenhagen, Denmark
- 14 <sup>55</sup>Department of Clinical Biochemistry, Herlev and Gentofte Hospital, Copenhagen  
15 University Hospital, Herlev, 2200 Copenhagen, Denmark
- 16 <sup>56</sup>Division of Clinical Epidemiology and Aging Research, German Cancer Research  
17 Center (DKFZ), D-69120, Heidelberg, Germany
- 18 <sup>57</sup>German Cancer Consortium (DKTK), German Cancer Research Center (DKFZ), D-  
19 69120 Heidelberg, Germany
- 20 <sup>58</sup>Division of Preventive Oncology, German Cancer Research Center (DKFZ) and  
21 National Center for Tumor Diseases (NCT), Im Neuenheimer Feld 460  
22 69120 Heidelberg, Germany
- 23 <sup>59</sup>Humangenetik Tuebingen, Paul-Ehrlich-Str 23, D-72076 Tuebingen, Germany
- 24 <sup>60</sup>The University of Texas M. D. Anderson Cancer Center, Department of Genitourinary  
25 Medical Oncology, 1515 Holcombe Blvd., Houston, TX 77030, USA
- 26 <sup>61</sup>Department of Genetics, Portuguese Oncology Institute of Porto (IPO-Porto), Porto,  
27 Portugal
- 28 <sup>62</sup>Biomedical Sciences Institute (ICBAS), University of Porto, Porto, Portugal
- 29 <sup>63</sup>Department of Population Sciences, Beckman Research Institute of the City of Hope,  
30 1500 East Duarte Road, Duarte, CA 91010, 626-256-HOPE (4673)
- 31 <sup>64</sup>Ghent University, Faculty of Medicine and Health Sciences, Basic Medical Sciences,  
32 Proeftuinstraat 86, B-9000 Gent
- 33 <sup>65</sup>Department of Surgery, Faculty of Medicine, University of Malaya, 50603 Kuala  
34 Lumpur, Malaysia



1 <sup>66</sup>Department of Urology, University of Washington, 1959 NE Pacific Street, Box 356510,  
2 Seattle, WA 98195, USA

3 <sup>67</sup>Institute of Human Genetics, University Medical Center Hamburg-Eppendorf, D-20246  
4 Hamburg, Germany

5 <sup>68</sup>Molecular Medicine Center, Department of Medical Chemistry and Biochemistry,  
6 Medical University of Sofia, Sofia, 2 Zdrave Str., 1431 Sofia, Bulgaria

7 <sup>69</sup>Department of Oncology, Cross Cancer Institute, University of Alberta, 11560  
8 University Avenue, Edmonton, Alberta, Canada T6G 1Z2

9 <sup>70</sup>Division of Radiation Oncology, Cross Cancer Institute, 11560 University Avenue,  
10 Edmonton, Alberta, Canada T6G 1Z2

11 <sup>71</sup>Molecular Endocrinology Laboratory, Department of Cellular and Molecular Medicine,  
12 KU Leuven, BE-3000, Belgium

13 <sup>72</sup>Division of Cancer Sciences, Manchester Cancer Research Centre, Faculty of Biology,  
14 Medicine and Health, Manchester Academic Health Science Centre, NIHR Manchester  
15 Biomedical Research Centre, Health Innovation Manchester, Univeristy of Manchester,  
16 M13 9WL

17 <sup>73</sup>Genomic Medicine Group, Galician Foundation of Genomic Medicine, Instituto de  
18 Investigacion Sanitaria de Santiago de Compostela (IDIS), Complejo Hospitalario  
19 Universitario de Santiago, Servicio Galego de Saúde, SERGAS, 15706, Santiago de  
20 Compostela, Spai

21 <sup>74</sup>University of California San Diego, Moores Cancer Center, La Jolla, CA 92037, USA

22 <sup>75</sup>Department of Urology, Erasmus University Medical Center, 3015 CE Rotterdam, The  
23 Netherlands

24 <sup>76</sup>Clinical Gerontology Unit, University of Cambridge, Cambridge, CB2 2QQ, UK

25 <sup>77</sup>Division of Epidemiology, Department of Internal Medicine, University of Utah School  
26 of Medicine, Salt Lake City, Utah, USA

27 <sup>78</sup>George E. Wahlen Department of Veterans Affairs Medical Center, Salt Lake City,  
28 Utah 84148, USA

29 <sup>79</sup>The University of Surrey, Guildford, Surrey, GU2 7XH

30 <sup>80</sup>Department of Laboratory Medicine and Pathology, Mayo Clinic, Rochester, MN  
31 55905, USA

32 <sup>81</sup>Program in Genetic Epidemiology and Statistical Genetics, Department of  
33 Epidemiology, Harvard School of Public Health, Boston, MA, USA

34 <sup>82</sup>Department of Epidemiology and Biostatistics, School of Public Health, Imperial



1 College London, SW7 2AZ, UK

2

3

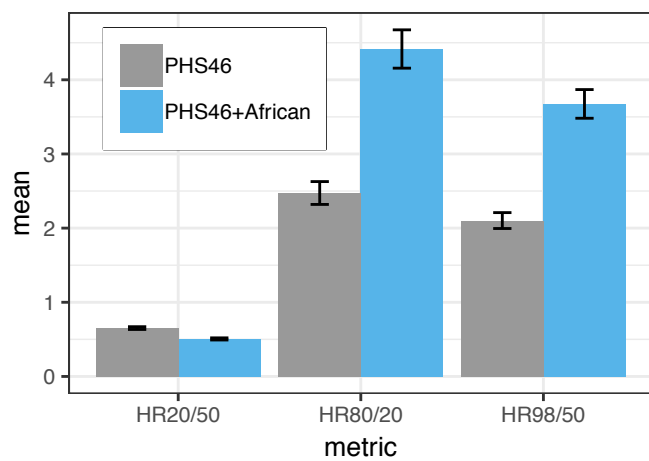

1

2

1

2 **Table S1. Contributing studies.** Descriptions of PRACTICAL study groups that  
 3 contributed data towards this analysis. The number of cases and controls provided by  
 4 each study group is also listed.

| <b>Study Group</b> | <b>Study Group Name</b>                                                              | <b>Cases</b> | <b>Controls</b> |
|--------------------|--------------------------------------------------------------------------------------|--------------|-----------------|
| <b>Acronym</b>     |                                                                                      |              |                 |
| BioVU              | Vanderbilt University                                                                | 204          | 0               |
| CPDR               | Uniformed Services University-Center for Prostate Disease Research                   | 135          | 41              |
| CeRePP             | French Prostate Case-Control Study                                                   | 101          | 84              |
| EPICAP             | EPIdemiology of Prostate CAncer                                                      | 20           | 9               |
| KARUPROSTATE       | French West Indies Prostate cancer Study                                             | 363          | 386             |
| MIAMI-WFPCS        | The University of Miami – Sylvester Comprehensive Cancer Center                      | 59           | 49              |
| MOFFITT            | The Moffitt Group                                                                    | 101          | 91              |
| NMHS               | Nashville Men’s Health Study                                                         | 176          | 188             |
| PCaP               | North Carolina – Louisiana Prostate Cancer Project Consortium                        | 967          | 0               |
| PROtEuS            | Prostate Cancer and Environment Study                                                | 70           | 53              |
| SABOR              | San Antonio Center of Biomarkers of Risk for Prostate Cancer                         | 105          | 106             |
| SCCS               | Southern Community Cohort Study                                                      | 291          | 1498            |
| SCPCS              | South Carolina Prostate Cancer Study                                                 | 57           | 32              |
| SFPCS              | San Francisco Bay Area Prostate Cancer Study                                         | 81           | 36              |
| SWOG-PCPT          | Prostate Cancer Prevention Trial                                                     | 43           | 121             |
| SWOG-SELECT        | Selenium and Vitamin E Cancer Prevention Trial                                       | 30           | 167             |
| UKGPCS             | U.K. Genetic Prostate Cancer Study and The Prostate Cancer Research Foundation Study | 365          | 0               |
| WUGS               | Washington University Genetics Study                                                 | 72           | 152             |

5

6

1 **Table S2. Permutation performance.** Mean and 95% confidence intervals for  
2 performance metrics estimated for each permutation of the cross-validation procedure.

| <b>metric</b> | <b>Any prostate cancer</b> | <b>Aggressive prostate cancer</b> |
|---------------|----------------------------|-----------------------------------|
| HR20/50       | 0.53 [0.51-0.54]           | 0.51 [0.50-0.53]                  |
| HR80/20       | 4.07 [3.81-4.32]           | 4.42 [4.09-4.77]                  |
| HR98/50       | 3.49 [3.29-3.69]           | 3.77 [3.50-4.04]                  |

3

4

1 **Table S3. Results of SNP-scan.** Description of 12 SNPs identified in 100 permutations  
2 of cross-validation SNP-scan. The position of each SNP is based on version 37. The  
3 count is the number of times the SNP appeared in permutations.

| <b>RS number</b> | <b>Chromosome</b> | <b>Effect</b> | <b>Reference</b> | <b>Position</b> | <b>count</b> |
|------------------|-------------------|---------------|------------------|-----------------|--------------|
| rs76229939       | 8                 | G             | A                | 128085394       | 87           |
| rs74421890       | 8                 | A             | G                | 128096183       | 87           |
| rs5013678        | 8                 | G             | A                | 128103979       | 54           |
| rs144732329      | 2                 | C             | A                | 20130787        | 18           |
| rs76595456       | 8                 | A             | G                | 128087829       | 13           |
| rs339353         | 6                 | A             | C                | 117202475       | 8            |
| rs1456315        | 8                 | A             | G                | 128103937       | 6            |
| rs184167671      | 17                | G             | A                | 54159621        | 5            |
| rs339359         | 6                 | A             | G                | 117160693       | 3            |
| rs610424         | 6                 | G             | A                | 117212258       | 1            |
| rs339302         | 6                 | T             | A                | 117224641       | 1            |
| rs6983561        | 8                 | C             | A                | 128106880       | 1            |

4

5

- 1 **Table S4. SNP correlation matrix.** Pearson correlation coefficient matrix of three SNPs
- 2 selected for addition to the PHS46+African model.

| <b>RS number</b> | rs76229939 | rs74421890 | rs5013678 |
|------------------|------------|------------|-----------|
| rs76229939       | 1          |            |           |
| rs74421890       | -0.0520    | 1          |           |
| rs5013678        | -0.0646    | -0.0759    | 1         |

3

4

1 **Table S5. Reference Threshold PHS46+African scores.** Reference threshold values  
2 for PHS46+African scores in African dataset.

3

| <b>Threshold</b>            | <b>Value</b> |
|-----------------------------|--------------|
| 20 <sup>th</sup> percentile | -0.58        |
| 30 <sup>th</sup> percentile | -0.47        |
| 70 <sup>th</sup> percentile | -0.13        |
| 80 <sup>th</sup> percentile | -0.02        |
| 98 <sup>th</sup> percentile | 0.39         |

4

5

6

1 **Table S6. Mean PHS46+African scores.** Mean PHS46+African risk scores are  
2 tabulated for all individuals, cases, and controls in the African dataset.

3

|          | <b>Mean [95% CI]</b> |
|----------|----------------------|
| All      | -0.22 [-0.23,-0.21]  |
| Cases    | -0.16[-0.17,-0.14]   |
| Controls | -0.29[-0.30,-0.28]   |

4

5
